# Supplementary material
Source: Springer Nature journal article supplement (https://www.springermedizin.de/resource/supplementary/12879_2009_1031_MOESM14_ESM.pdf/9442434)
Supplement: MOESM14 [file 9442434]

# 1 Tables

2 **Tables 1 : Presence of significant clustering for cases.** Proportion of time that significant  
 3 clustering was exhibited (corrected for the presence of the disease) for clusters between cases.

4 **Tables 2 : Presence of significant clustering for cases-water** Analogous to Table 1, but  
 5 considering the clustering of cases with respect to water sources.

6

|             |                 | Proportion of time with sig. clustering of cases |                 |              |
|-------------|-----------------|--------------------------------------------------|-----------------|--------------|
|             | Interval        | classical Ogawa                                  | classical Inaba | El Tor Inaba |
| Fall Peak   | $[0 - \pi]$     | 0.7278                                           | 0.9218          | 0.9722       |
|             | $[\pi - 2\pi]$  | 0.8218                                           | 0.8889          | 0.9611       |
| Spring Peak | $[2\pi - 3\pi]$ | 0.6259                                           | 0.9278          | 0.8833       |
|             | $[3\pi - 4\pi]$ | 0.7206                                           | 0.8111          | 0.9700       |

7 Table 1

|             |                 | Proportion of time with sig. clustering of cases-water |                 |              |
|-------------|-----------------|--------------------------------------------------------|-----------------|--------------|
|             | Interval        | classical Ogawa                                        | classical Inaba | El Tor Inaba |
| Fall Peak   | $[0 - \pi]$     | 0.8000                                                 | 0.9665          | 0.9994       |
|             | $[\pi - 2p]i$   | 0.8851                                                 | 0.9991          | 0.9996       |
| Spring Peak | $[2\pi - 3\pi]$ | 0.7143                                                 | 0.9833          | 0.9667       |
|             | $[3\pi - 4\pi]$ | 0.8676                                                 | 0.8667          | 0.9992       |

8 Table 2

1
